# Supplementary material for: Carbonization of cellulose cell wall evaluated with ultraviolet microscopy
Source: Royal Society of Chemistry journal article supplement (doi:10.1039/c9ra09435k), 2020-01-01
Supplement: c9ra09435k1.pdf [file c9ra09435k1.pdf]

BPH

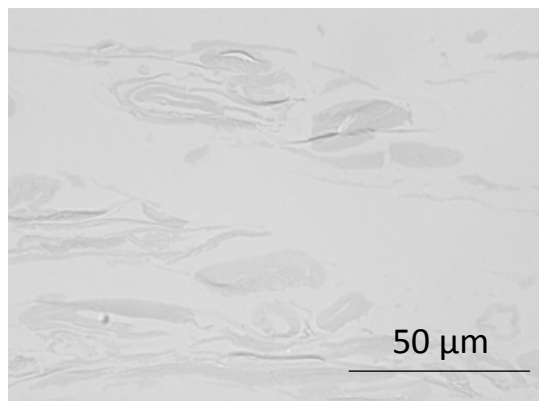

DPS

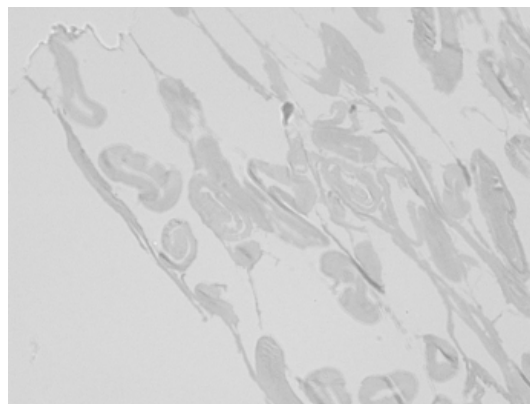

DPB

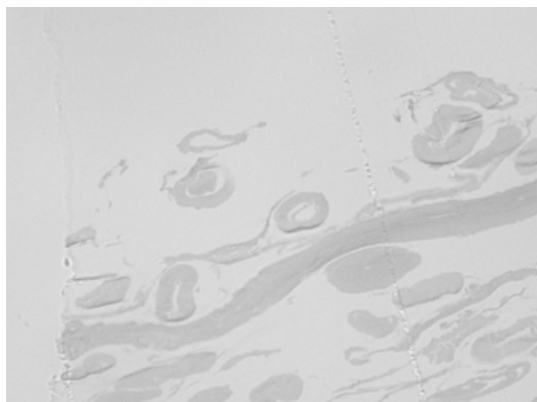

In N<sub>2</sub>

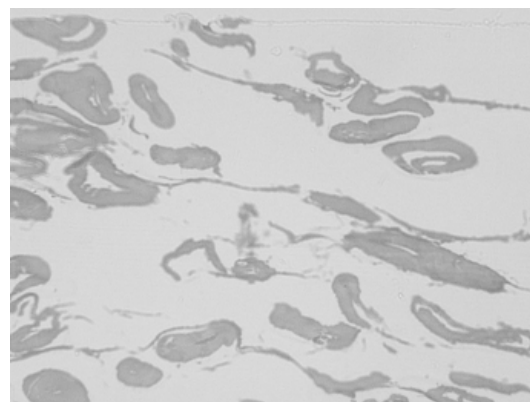

BPH

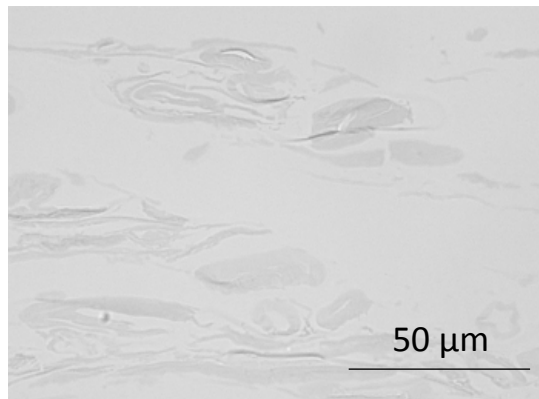

DPS

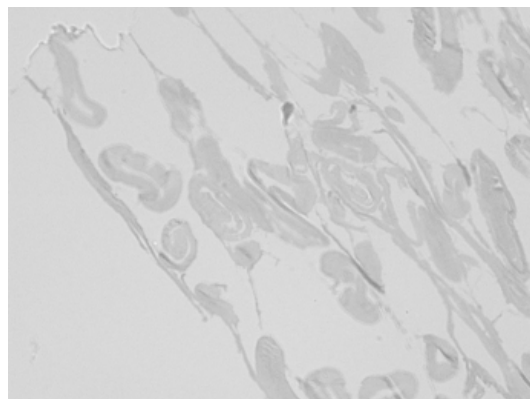

DPB

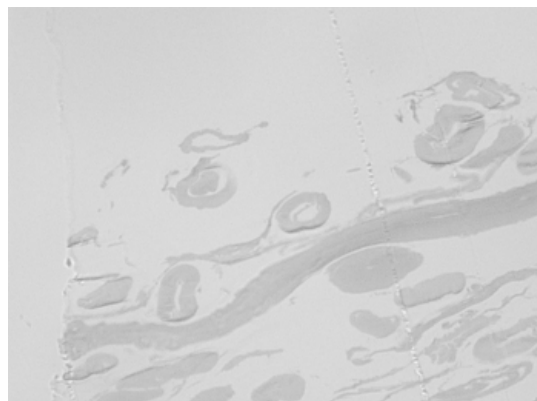

In  $\text{N}_2$

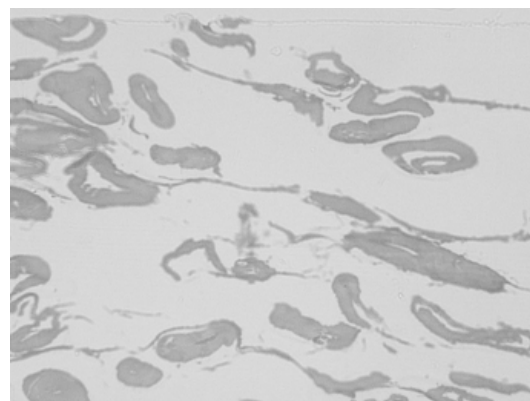

Fig. S1 A wider field of UV microscopic image (280 nm) of pyrolyzed cellulose in nitrogen and aromatic solvents at 280 °C
